# Supplementary material for: The impact of marine recreational fishing on key fish stocks in European waters
Source: PLoS One. 2018 Sep 12;13(9):e0201666. doi: 10.1371/journal.pone.0201666 (PMC6135385; doi:10.1371/journal.pone.0201666)
Supplement: S1 Table — (XLSX) [file pone.0201666.s001.xlsx]

## Sheet: bss-47
Parameters	Value	Source
Average Retained weight	1.06901
Average released Weight	0.405132
Average Release Probability (#)	0.54804
Commercial discard to landings ratio	0.05	ICES 2014 bss-47 assessment
Recreational Discard Mortality	0.05	Lewin et al. (submitted)
Commercial Discard Mortality	1	Precautionary approach
Init data
Country	Recreational data year	Angler Numbers	Retained weight	Retained Number	Released weight	Released Number	Source/notes	Additional notes
Belgium	2013	24409	NA	NA	NA	NA	NA
France	2009-2011	791000	940	781217	332	796373	France Ifremer; Rocklin et al. 2014
Netherlands	2011	504108	138	234000	NA	131000	van der Hammen (2013)
England	2012	884000	332.472	304198	201.957	521612	Armstrong, 2012
Wales	NA	76000	NA	NA	NA	NA	NA
Channel Islands	NA	4092	NA	NA	NA	NA	NA
Isle of Man	NA	1560	NA	NA	NA	NA	2014 Population from World Bank * UK participation rate (Hyder et al., 2017)
Reconstruction									Calculations
Country	Angler numbers	Retained weight	Retained Number	Released weight	Released Number	Notes	Reconstructed retained?	Reconstructed released?	Retained Wt	Retained # calculation	Released # calculation	Bias
Belgium	24409	8.97919	8399.52	1.86493	4603.27		Y	Y	Avg	EN	Prop	-3
France	791000	940	781217	332	428139		N	N	None	Avg	Prop	0
Netherlands	504108	138	234000	53.0722	131000		N	Y	None	Avg	None	0
England	884000	332.472	304198	201.957	521612		N	N	None	None	None	0
Wales	76000	27.9577	26152.8	18.1679	44844.4		Y	Y	Avg	EN	EN	0
Channel Islands	4092	1.5053	1408.12	0.978198	2414.52		Y	Y	Avg	EN	EN	0
Isle of Man	1560	0.573868	536.82	0.37292	920.491		Y	Y	Avg	EN	EN	0
		371.488		223.341
% of total weight reconstructed
Retained weight	Released Weight	Total weight
0.0269171	0.122378	0.0551398
Summary with post release mortalities
	Recreational			Commercial			% of catch
Country	Kept	Released mortality	Removal	Landings	Discard mortality	Removal	Recreational	Commercial	Source	Total removal
Belgium	8.97919	0.0932466	9.07244	154	7.7	161.7	0.0531259	0.946874	ICES Bss-47 2016 assessment	170.772	-27.2173										Belgium	0.0061304	0.0386255
France	940	16.6	956.6	2399	119.95	2518.95	0.275237	0.724763	ICES Bss-47 2016 assessment (estimated landings)	3475.55	0										France	0.646391	0.601706
Netherlands	138	2.65361	140.654	376	18.8	394.8	0.262681	0.737319	ICES Bss-47 2016 assessment	535.454	0										Netherlands	0.0950421	0.0943065
England	332.472	10.0979	342.57	778.706	38.9353	817.641	0.295265	0.704735	MMO, 2012	1160.21	0										England	0.23148	0.195311
Wales	27.9577	0.908395	28.8661	61.2348	3.06174	64.2965	0.309846	0.690154	ICES Bss-47 2016 assessment	93.1626	0										Wales	0.0195053	0.0153586
Channel Islands	1.5053	0.0489099	1.55421	55	2.75	57.75	0.0262074	0.973793	MMO, 2012	59.3042	0										Channel Islands	0.00105021	0.0137948
Isle of Man	0.573868	0.018646	0.592514	0	0	0	1	0	MMO, 2012	0.592514	0										Isle of Man	0.000400372	0
Total ICES	1449.49	30.4207	1479.91	3987	199.35	4186.35	0.261179	0.738821	ICES Bss-47 2016 assessment (ICES estimates)	5666.26	-0.0183912
Leave-one-out (* = countries used in leave-one-out procedure)
Country	Angler numbers	Retained weight	Retained Number	Released weight	Released Number	Released Mortality	Removal
Belgium	24409	8.97919	8399.52	1.86493	4603.27	0.0932466	9.07244
France	791000	940	781217	332	428139	16.6	956.6
Netherlands*	504108	185.443	173471	120.508	297453	6.02538	191.469
England*	884000	438.659	410341	93.0671	229721	4.65335	443.313
Wales	76000	27.9577	26152.8	18.1679	44844.4	0.908395	28.8661
Channel Islands	4092	1.5053	1408.12	0.978198	2414.52	0.0489099	1.55421
Isle of Man	1560	0.573868	536.82	0.37292	920.491	0.018646	0.592514	Upper confidence limit	Lower confidence limit	Result
						Total (LOO)	1631.47	2060.03	899.785	Good

## Sheet: Bss-8c9a
Parameters	Value	Source
Average Retained weight	0.835449
Average released Weight	0.380281
Average Release Probability (#)	0.571218
Commercial discard to landings ratio	0	ICES Bss-8c9a 2015 assessment
Recreational Discard Mortality	0.05	Lewin et al. (submitted)
Commercial Discard Mortality	1	Precautionary approach
Init data
Country	Recreational data year	Angler Numbers	Retained weight	Retained Number	Released weight	Released Number	Source/notes
Spain Basque country (VIIIc)	2015-2016	62459	151.42	168968	85.6	225097	DCF Sampling. Years 2015 & 2016 (Basque = 35% of licences in VIIIc)
Portugal (North)	2001	59889	7.16	20846	NA	NA	Veiga et al, 2010. Number of anglers calculated trough examining total population in study area * participation rate (1.67%) in Hyder et al, 2017. retained number calculated from average weight in study
Spain	NA	164946	NA	NA	NA	NA	Number of anglers = estimation of licenses by Zarauz pers. Comm. Worth noting that southern IXa region landings likey to be significantly different than those in the north but there are no data to prove this.
Portugal	NA	175000	NA	NA	NA	NA	No. of anglers from Hyder et al. 2017
Reconstruction									Calculations
Country	Angler numbers	Retained weight	Retained Number	Released weight	Released Number	Notes	Reconstructed retained?	Reconstructed released?	Retained Wt	Retained # calculation	Released # calculation
Spain	164946	372.796	446222	226.058	594452		151.42	85.6	Avg	BASQUE	BASQUE	-2
Portugal	175000	20.922	60913.5	13.2318	34794.9		7.32	0	Port (N)	Port (N)	Prop	-2
		393.718		239.29
Took a different approach to calculating reconstruction % here as partial values were given for countries. Minused the known landed weight from the reconstructed weight to get the % reconstructed
% of total weight reconstructed
Retained weight	Released Weight	Total weight	Notes
0.596818	0.642275	0.614002	Although % are quite high, I would expect the relaibility of these reconstructions to be much higher due to the reconstructions being based on data for that country, albeiet a small section.
Summary with post release mortalities
	Recreational			Commercial			% of catch
Country	Kept	Released mortality	Removal	Landings	Discard mortality	Removal	Recreational	Commercial	Source	Total removal	Notes
Spain	372.796	11.3029	384.099	317	0	317	0.547853	0.452147	ICES catch statistics webpage	701.099	Discards considered negligable	-768.198
Portugal	20.922	0.66	21.582	271	0	271	0.0737641	0.926236	ICES bss-8c9a assessment	292.582	Discards considered negligable	-43.1641
Total ICES	393.718	11.9629	405.681	701	0	701	0.366575	0.633425		1106.68		-2
Leave-one-out (* = countries used in leave-one-out procedure)
Country	Angler numbers	Retained weight	Retained Number	Released weight	Released Number	Released Mortality	Removal
Spain*	164946	47.9665	57414	12.4716	32795.9	0.623582	48.59
Portugal*	175000	395.519	473421	239.837	630685	11.9919	407.511	Upper confidence limit	Lower confidence limit	Result
						Total (LOO)	456.101	564.71	246.655	Good

## Sheet: Bss-8ab
Parameters	Value	Source
Average Retained weight	1.20325
Average released Weight	0.41689
Average Release Probability (#)	0.504686
Commercial discard to landings ratio	0	ICES bss-8ab assessment
Recreational Discard Mortality	0.05	Lewin et al. (submitted)
Commercial Discard Mortality	1	Precautionary approach
Init data
Country	Recreational data year	Angler Numbers	Retained weight	Retained Number	Released weight	Released Number	Source/notes
France	2009-2011	791000	1405	1167670	496	1189762	Rocklin et al. 2014
Reconstruction									Calculations
Country	Angler numbers	Retained weight	Retained Number	Released weight	Released Number	Notes	Reconstructed retained?	Reconstructed released?	Retained Wt	Retained # calculation	Released # calculation
France (Bay of Biscay)	791000	1405	1167670	496	1189762		N	N	None	None	None	0
% of total weight reconstructed
Retained weight	Released Weight	Total weight
0	0	0
Summary with post release mortalities
	Recreational			Commercial			% of catch
Country	Kept	Released mortality	Removal	Landings	Discard mortality	Removal	Recreational	Commercial	Source	Total removal	Notes
France	1405	24.8	1429.8	2325	0	2325	0.380793	0.619207	ICES 2015 bss-8ab assessment	3754.8	Discards considered negligable	0
Total ICES	1405	24.8	1429.8	2554	0	2554	0.358904	0.641096	ICES 2015 bss-8ab assessment (Estimated total landings)	3983.8		0
Cant do leave one out as only one country

## Sheet: Recreational landings (Bss-47)
Country	Year	Number of anglers	Kept-wt	Kept-No.	Rel-Wt	Rel-No.	Source
Belgium	2013	24409	NA	NA	NA	NA	NA
Channel Islands	NA	4092	NA	NA	NA	NA	NA
England	2012	884000	332.472	304198	201.957	521612	Armstrong, 2012
France	2009-2011	791000	940	781217	332	796373	France Ifremer; Rocklin et al. 2014
Isle of Man	NA	1560	NA	NA	NA	NA	2014 Population from World Bank * UK participation rate (Hyder et al., 2017)
Netherlands	2011	504108	138	234000	NA	131000	van der Hammen (2013)
Wales	NA	76000	NA	NA	NA	NA	NA
		781.217	796.373
	No	781217	796373
	t	940	332

## Sheet: Recreational landings (Bss-8c9a
Country	Year	Number of anglers	Kept-wt	Kept-No.	Rel-Wt	Rel-No.	Source
Spain Basque country (VIIIc)	2015-2016	62459	151.42	168968	85.6	225097	DCF Sampling. Years 2015 & 2016 (Basque = 35% of licences in VIIIc)
Portugal (North)	2001	59889	7.16	20846	NA	NA	Veiga et al, 2010. Number of anglers calculated trough examining total population in study area * participation rate (1.67%) in Hyder et al, 2017. retained number calculated from average weight in study
Spain	NA	164946	NA	NA	NA	NA	Number of anglers = estimation of licenses by Zarauz pers. Comm. Worth noting that southern IXa region landings likey to be significantly different than those in the north but there are no data to prove this.
Portugal	NA	175000	NA	NA	NA	NA	No. of anglers from Hyder et al. 2017

## Sheet: Recreational landings (Bss-8ab)
Country	Year	Number of anglers	Kept-wt	Kept-No.	Rel-Wt	Rel-No.	Source
France	2009-2011	791000	1405	1167670	496	1189762	Rocklin et al. 2014

## Sheet: Commercial landings (Bss-47)
Country	Landings	Source
Belgium	154	ICES Bss-47 2016 assessment
France	2399	ICES Bss-47 2016 assessment (estimated landings)
Netherlands	376	ICES Bss-47 2016 assessment
England	778.706	MMO, 2012
Wales	61.2348	ICES Bss-47 2016 assessment
Channel Islands	55	MMO, 2012
Scotland	51.2812	MMO, 2012
Isle of Man	0	MMO, 2012
Ireland	0	MMO, 2012
Germany	0	ICES Bss-47 2016 assessment
Total ICES	3987	ICES Bss-47 2016 assessment (ICES estimates)

## Sheet: Commercial landings (Bss-8c9a)
Country	Landings	Source
France	2	ICES bss-8c9a assessment
Portugal	271	ICES bss-8c9a assessment
Spain	317	ICES catch statistics webpage
Total ICES	701	ICES bss-8c9a assessment

## Sheet: Commercial landings (bss-8ab)
Country	Landings	Source
Belgium	0	ICES 2015 bss-8ab assessment
France	2325	ICES 2015 bss-8ab assessment
Spain	201	ICES 2015 bss-8ab assessment (ICES estimate)
Netherlands	0	ICES 2015 bss-8ab assessment
United Kingdom	5	ICES 2015 bss-8ab assessment
Total ICES	2554	ICES 2015 bss-8ab assessment (Estimated total landings)

## Sheet: Discard mortality
Commercial	C-Source	Recreational	R-Source	8c9a commercial
1	Precautionary approach	0.05	Lewin et al. (submitted)	0	ICES Bss-8c9a 2015 assessment

[truncated: 2 more sheets: Discard rate, Portugal calculation]
