# Supplementary material for: The impact of marine recreational fishing on key fish stocks in European waters
Source: PLoS One. 2018 Sep 12;13(9):e0201666. doi: 10.1371/journal.pone.0201666 (PMC6135385; doi:10.1371/journal.pone.0201666)
Supplement: S2 Table — (XLSX) [file pone.0201666.s002.xlsx]

## Sheet: Cod-347d
Parameters	Value	Source
Average Retained weight	1.77026
Average released Weight	0.154218
Average Release Probability (#)	0.253031
Commercial discard rate	0.233195	WGNSSK (2017)
Recreational Discard Mortality	0.165	Cappizano et al. (2016)
Commercial Discard Mortality	0.31	Depestele et al. (2014)
Total commercial discards	8689
Init data
Country	Year	Angler Numbers	Retained weight	Retained Number	Released weight	Released Number	Source	Notes	Bias
Germany	2007	32000	30	NA	NA	NA	Strehlow et al. (2012) - Angler number from Hyder et al (2018) supplementary material
Denmark	2015	386000	523	348667	NA	NA	Sparrevohn et al. (2012)
Sweden	2015	565634	795	NA	NA	NA	Hyder et al. (2018)
Norway	2012	1285163	NA	NA	NA	NA	NA
England	2012	884000	280.47	227126	43.3	85455	Armstrong et al. (2013)
Scotland	2012	125188	NA	NA	NA	NA	NA
Belgium	2014-2015	24409	264.5	NA	NA	NA	Persoon (2015)
Netherlands	2010/2011	504108	1145	527000	73	170000	(van der Hammen and de Graaf, 2013,2015,2016)
France	2006	791000	189.5	NA	NA	NA	Herfaut et al. (2013)
Norway Tourism	2009-2011	NA	27	13129	NA	NA	Vølstad et al. (2011)
Reconstruction						Calculations
Country	Angler numbers	Retained weight	Retained Number	Released weight	Released Number	Reconstructed retained?	Reconstructed released?	Retained Wt	Retained # calculation	Released # calculation	Notes	Bias
Germany	32000	30	16946.7	0.661293	4288.03	N	Y	None	Avg	Prop	Calculation from papers weights in denmark recreational sheet	-1
Denmark	386000	523	348667	13.6057	88223.5	N	Y	None	None	Prop		0
Sweden	565634	795	449087	17.5243	113633	N	Y	None	Avg	Prop		0
Norway	1285163	584.533	330197	19.1593	124235	Y	Y	Avg	EN	EN		0
England	884000	280.47	227126	43.3	85455	N	N	None	None	None		0
Scotland	125188	56.9395	32164.5	1.86631	12101.7	Y	Y	Avg	EN	EN		0
Belgium	24409	264.5	149413	5.8304	37806.1	N	Y	None	Avg	Prop		-1
Netherlands	504108	1145	527000	73	170000	N	N	None	None	None		0
France	791000	189.5	107047	4.17717	27086.1	N	Y	None	Avg	Prop		1
		2947		114.799
% of total weight reconstructed
Retained weight	Released Weight	Total weight
0.165801	0.35073	0.173984
Summary with post release mortalities
	Recreational			Commercial			% of catch
Country	Kept	Released mortality	Removal	Landings	Discard mortality	Removal	Recreational	Commercial	Source	Total removal	Bias
Germany	30	0.109113	30.1091	2463	178.051	2641.05	0.0112719	0.988728	WGNSSK (2017)	2671.16	-30.1091
Denmark	523	2.24494	525.245	7981	576.95	8557.95	0.057826	0.942174	WGNSSK (2017)	9083.19	0
Sweden	795	2.8915	797.892	992	71.7121	1063.71	0.428604	0.571396	WGNSSK (2017)	1861.6	0
Norway	584.533	3.16128	587.695	5216	377.067	5593.07	0.0950845	0.904915	WGNSSK (2017)	6180.76	0
England	280.47	7.1445	287.615	1479.58	106.959	1586.54	0.153464	0.846536	MMO (2016)	1874.15	0
Scotland	56.9395	0.307941	57.2475	10565	763.748	11328.7	0.00502788	0.994972	WGNSSK (2017)	11386	0
Belgium	264.5	0.962015	265.462	902	65.2059	967.206	0.215356	0.784644	WGNSSK (2017)	1232.67	-265.462
Netherlands	1145	12.045	1157.05	1995	144.219	2139.22	0.351017	0.648983	WGNSSK (2017)	3296.26	0
France	189.5	0.689232	190.189	1253	90.5799	1343.58	0.124001	0.875999	WGNSSK (2017)	1533.77	190.189
ICES estimate landings + discard	3868.94	29.5555	3898.5	32696	2693.59	35389.6	0.0992285	0.900771	WGNSSK (2017)	39288.1	-0.0270314
Leave-one-out (* = countries used in leave-one-out procedure)
Country	Angler numbers	Retained weight	Retained Number	Released weight	Released Number	Dead releases	Removal
Germany	32000	30	16946.7	0.661293	4288.03	0.109113	30.1091
Denmark	386000	523	348667	13.6057	88223.5	2.24494	525.245
Sweden	565634	795	449087	17.5243	113633	2.8915	797.892
Norway	1285163	584.533	330197	19.1593	124235	3.16128	587.695
England*	884000	1635.97	924143	45.9741	298111	7.58573	1643.56
Scotland	125188	56.9395	32164.5	1.86631	12101.7	0.307941	57.2475
Belgium	24409	264.5	149413	5.8304	37806.1	0.962015	265.462
Netherlands*	504108	19.9744	129520	7.51527	48731.4	1.24002	21.2144
France	791000	189.5	107047	4.17717	27086.1	0.689232	190.189	Upper confidence limit	Lower confidence limit	Result
						Total (LOO)	4118.61	5426.71	2370.29	Good

## Sheet: Cod-7e-k
Parameters	Value	Source
Average Retained weight	1.03961	Likely wrong as only based on England
Average released Weight	0.396756
Average Release Probability (#)	0.0957679
Commercial Discard rate	0.123749	WGCSE (2017)
Recreational Discard Mortality	0.165	Cappizano et al. (2016)
Commercial Discard Mortality	0.31	Depestele et al. (2014)
Total commercial discards	952	ICES 2017 assessment
Init data
Country	Year	Angler Numbers	Retained weight	Retained Number	Released weight	Released Number	Source	Notes
Channel Islands	2012	4092	NA	NA	NA	NA	NA
England	2012	884000	89.56	86148	3.62	9124	Armstrong et al. (2013)
France	2006	791000	189.5	NA	NA	NA	Herfaut et al. (2013)
Ireland	2012	76600	NA	NA	NA	NA	NA
Wales	2012	76000	NA	NA	NA	NA	NA
Reconstruction									Calculations
Country	Angler numbers	Retained weight	Retained Number	Released weight	Released Number	Reconstructed retained?	Reconstructed released?	Retained Wt	Retained # calculation	Released # calculation	Notes	Bias
Channel Islands	4092	0.41457	398.776	0.0167568	42.2346	Y	Y	Avg	EN	EN		0
England	884000	89.56	86148	3.62	9124	N	N	None	None	None		0
France	791000	189.5	182281	6.92602	17456.6	N	Y	None	Avg	Prop		1
Ireland	76600	7.76052	7464.86	0.313679	790.609	Y	Y	Avg	EN	EN		0
Wales	76000	7.69973	7406.39	0.311222	784.416	Y	Y	Avg	EN	EN		0
		294.935	105.435	11.1877
% of total weight reconstructed
Retained weight	Released Weight	Total weight
0.0538248	0.67643	0.0765788	0.0567338
Summary with post release mortalities
	Recreational			Commercial			% of catch
Country	Kept	Released mortality	Removal	Landings	Discard mortality	Removal	Recreational	Commercial	Source	Total removal	Bias
Channel Islands	0.41457	0.00276488	0.417334	0.5889	0.0225915	0.611491	0.405641	0.594359	MMO (2016)	1.02883	0
England	89.56	0.5973	90.1573	558.208	21.414	579.622	0.134608	0.865392	MMO (2016)	669.779	0
France	189.5	1.14279	190.643	5166	198.179	5364.18	0.0343202	0.96568	WGCSE (2017)	5554.82	190.643
Ireland	7.76052	0.051757	7.81227	1536	58.9243	1594.92	0.00487433	0.995126	WGCSE (2017)	1602.74	0
Wales	7.69973	0.0513516	7.75108	1.8438	0.0707321	1.91453	0.801923	0.198077	MMO (2016)	9.66561	0
Total	294.935	1.84597	296.781	7262.64	278.61	7541.25	0.0378642	0.962136	2012 landings	7838.03	0.642369
ICES estimate landings + discard	294.935	1.84597	296.781	7693	295.12	7988.12	0.0358219	0.964178	WGCSE (2017)	8284.9
Leave-one-out (* = countries used in leave-one-out procedure)
Country	Angler numbers	Retained weight	Retained Number	Released weight	Released Number	Dead releases	Removal
Channel Islands	4092	0.41457	398.776	0.0167568	42.2346	0.00276488	0.417334
England*	884000	211.78	203712	7.74033	19509	1.27715	213.057
France*	791000	80.138	77084.9	3.23916	8164.12	0.534462	80.6724
Ireland	76600	7.76052	7464.86	0.313679	790.609	0.051757	7.81227
Wales	76000	7.69973	7406.39	0.311222	784.416	0.0513516	7.75108	Upper confidence limit	Lower confidence limit	Result
						Total (LOO)	309.71	413.119	180.443	Good

## Sheet: Cod-2224
Parameters	Value	Source
Average Retained weight	1.26446
Average released Weight	0.177622
Average Release Probability (#)	0.319042
Commercial discard rate	0.04	WGBFAS (2017)
Recreational Discard Mortality	0.112	Welterbach & Strehlow (2013)
Commercial Discard Mortality	0.31	Depestele et al. (2014)
Total Commercial discards	564
Init data
Country	Year	Angler Numbers	Retained weight	Retained Number	Released weight	Released Number	Source	Notes
Denmark	2012	386000	1272	978462	220	657419	Hyder et al. (2018)
Germany	2015	163000	3032	2430020	410	1138514	Hyder et al. (2018)
Sweden	2015	565634	215	165385	51	152663	Hyder et al. (2018)
Reconstruction									Calculations
Country	Angler numbers	Retained weight	Retained Number	Released weight	Released Number	Reconstructed retained?	Reconstructed released?	Retained Wt	Retained # calculation	Released # calculation	Notes	Bias
Denmark	386000	1272	978462	220	657419	N	N	None	None	None		2
Germany	163000	3032	2430020	410	1138514	N	N	None	None	None		1
Sweden	565634	215	165385	51	152663	N	N	None	None	None	Reconstructed from province CPUE	-3
		4519		681
% of total weight reconstructed
Retained weight	Released Weight	Total weight
0	0	0	0
Summary with post release mortalities
	Recreational			Commercial			% of catch
Country	Kept	Released mortality	Removal	Landings	Discard mortality	Removal	Recreational	Commercial	Source	Total removal	Bias
Denmark	1272	24.64	1296.64	7361	91.28	7452.28	0.148206	0.851794		8748.92	0.564337
Germany	3032	45.92	3077.92	2915	36.15	2951.15	0.510513	0.489487		6029.07	0.669802
Sweden	215	5.71	220.71	2351	29.15	2380.15	0.0848604	0.91514		2600.86	-0.144089
Total	4519	76.27	4595.27	12627	174.84	12801.8	0.26414	0.73586		17397.1	0.000237211
	4304
Leave-one-out (* = countries used in leave-one-out procedure)
Country	Angler numbers	Retained weight	Retained Number	Released weight	Released Number	Dead releases	Removal
Denmark*	386000	7180.07	5.75453e+06	970.92	2.69611e+06	108.743	7288.82
Germany*	163000	537.14	413185	92.9016	277615	10.405	547.545
Sweden	565634	215	165385	51	152663	5.712	220.712	Upper confidence limit	Lower confidence limit	Result
						Total (LOO)	6396.62	2793.93	3708.04	Bad

## Sheet: Cod-2532
Parameters	Value	Source
Average Retained weight	#DIV/0!
Average released Weight	#DIV/0!
Average Release Probability (weight)	#DIV/0!
Average Release Probability (#)	#DIV/0!
Commercial Discard rate	0.123382	WGCSE (2017)
Recreational Discard Mortality	0.112	Welterbach & Strehlow (2013)
Commercial Discard Mortality	0.31	Depestele et al. (2014)
Total Commercial discards	6795
Init data
Country	Year	Angler Numbers	Retained weight	Retained Number	Released weight	Released Number	Source	Notes
Estonia	2014	20000	0.9	NA	NA	NA	WGRFS (2016)
Finland	2014	300000	0	NA	NA	NA	WGRFS (2016)
Latvia	2012	41000	0.1	NA	NA	NA	WGRFS (2016)
Lithuania	2015	60000	30	NA	NA	NA	WGRFS (2016)
Poland	2015	82000	857	NA	NA	NA	WGRFS (2016)
Sweden	2015	565634	NA	NA	NA	NA	Hyder et al. (2018)
Reconstruction									Calculations
Country	Angler numbers	Retained weight	Retained Number	Released weight	Released Number	Reconstructed retained?	Reconstructed released?	Retained Wt	Retained # calculation	Released # calculation	Notes	Bias
Estonia	20000	0.9	NA	NA	NA	Y	Y	None	SE	SE
Finland	300000	0	NA	NA	NA	Y	Y	None	SE	SE
Latvia	41000	0.1	NA	NA	NA	Y	Y	None	SE	SE
Lithuania	60000	30	NA	NA	NA	Y	Y	None	SE	SE
Poland	82000	857	NA	NA	NA	Y	Y	None	SE	SE
Sweden	565634	282.82	NA	NA	NA	N	Y	LT	None	None
% of total weight reconstructed
Retained weight	Released Weight	Total weight
0.758443	#DIV/0!	0.758443
Summary with post release mortalities
	Recreational			Commercial			% of catch
Country	Kept	Released mortality	Removal	Landings	Discard mortality	Removal	Recreational	Commercial	Source	Total removal	Bias
Estonia	0.9	0	0.9	686	26.24	712.24	0.00131023	0.99869		686.9
Finland	0	0	0	1405	53.74	1458.74	0	1		1405
Latvia	0.1	0	0.1	4269	163.28	4432.28	2.34241e-05	0.999977		4269.1
Lithuania	30	0	30	2261	86.48	2347.48	0.0130947	0.986905		2291
Poland	857	0	857	14007	535.75	14542.8	0.0576561	0.942344		14864
Sweden	282.82	0	282.82	10109	386.65	10495.6	0.0272156	0.972784		10391.8
Total	1170.82	0	1170.82	51225	2106.45	53331.4	0.0223457	0.977654		52395.8
						Estonia	0.000768692	0.0133919
						Finland	0	0.027428
						Latvia	8.54102e-05	0.0833382
						Lithuania	0.0256231	0.0441386
						Poland	0.731966	0.273441
						Sweden	0.241557	0.197345
								0.639082	0.360918

## Sheet: Country recreational landings
Country	Year	Number of anglers	C-Ret-Wt	C-Ret-No	C-Rel-Wt	C-Rel-No	N-Ret-Wt	N-Ret-No	N-Rel-Wt	N-Rel-No	Source
Belgium	2014-2015	24409	NA	NA	NA	NA	264.5	NA	NA	NA	Persoon (2015)
Channel Islands	2012	4092	NA	NA	NA	NA	NA	NA	NA	NA	NA
Denmark	2015	386000	NA	NA	NA	NA	523	348667	NA	NA	Sparrevohn et al. (2012)
England	2012	884000	89.56	86148	3.62	9124	280.47	227126	43.3	85455	Armstrong et al. (2013)
France	2006	791000	189.5	NA	NA	NA	189.5	NA	NA	NA	Herfaut et al. (2013)
Germany	2007	32000	NA	NA	NA	NA	30	NA	NA	NA	Strehlow et al. (2012) - Angler number from Hyder et al (2018) supplementary material
Ireland	2012	76600	NA	NA	NA	NA	NA	NA	NA	NA	NA
Netherlands	2010/2011	504108	NA	NA	NA	NA	1145	527000	73	170000	(van der Hammen and de Graaf, 2013,2015,2016)
Norway	2012	1285163	NA	NA	NA	NA	NA	NA	NA	NA	NA
Norway Tourism	2009-2011	NA	NA	NA	NA	NA	27	13129	NA	NA	Vølstad et al. (2011)
Scotland	2012	125188	NA	NA	NA	NA	NA	NA	NA	NA	NA
Sweden	2015	565634	NA	NA	NA	NA	795	NA	NA	NA	Hyder et al. (2018)
Wales	2012	76000	NA	NA	NA	NA	NA	NA	NA	NA	NA

## Sheet: Baltic recreational landings
Country	Year	Number of anglers	Eastern-Ret-Wt	Eastern-Ret-No	Eastern-Rel-Wt	Eastern-Rel-No	Western-Ret-Wt	Western-Ret-No	Western-Rel-Wt	Western-Rel-No	Source
Denmark	2012	386000	NA	NA	NA	NA	1272	978462	220	657419	Hyder et al. (2018)
Estonia	2014	20000	0.9	NA	NA	NA	NA	NA	NA	NA	WGRFS (2016)
Finland	2014	300000	0	NA	NA	NA	NA	NA	NA	NA	WGRFS (2016)
Germany	2015	163000	NA	NA	NA	NA	3032	2430020	410	1138514	Hyder et al. (2018)
Latvia	2012	41000	0.1	NA	NA	NA	NA	NA	NA	NA	WGRFS (2016)
Lithuania	2015	60000	30	NA	NA	NA	NA	NA	NA	NA	WGRFS (2016)
Poland	2015	82000	857	NA	NA	NA	NA	NA	NA	NA	WGRFS (2016)
Sweden	2015	565634	NA	NA	NA	NA	215	165385	51	152663	Hyder et al. (2018)

## Sheet: Country commercial landings
Country	Cod-7e-k	Source	Cod-347d	Source
Belgium	290	WGCSE (2017)	902	WGNSSK (2017)
Channel Islands	0.5889	MMO (2016)	0	WGNSSK (2017)
Denmark	0	WGCSE (2017)	7981	WGNSSK (2017)
England	558.208	MMO (2016)	1479.58	MMO (2016)
France	5166	WGCSE (2017)	1253	WGNSSK (2017)
Germany	0	WGCSE (2017)	2463	WGNSSK (2017)
Ireland	1536	WGCSE (2017)	0	WGNSSK (2017)
Netherlands	0	WGCSE (2017)	1995	WGNSSK (2017)
Norway	0	WGCSE (2017)	5216	WGNSSK (2017)
Scotland	41.8448	MMO (2016)	10565	WGNSSK (2017)
Sweden	0	WGCSE (2017)	992	WGNSSK (2017)
Wales	1.8438	MMO (2016)	1.16	MMO (2016)
ICES estimate landings + discard	7693	WGCSE (2017)	32696	WGNSSK (2017)

## Sheet: Discard Mortality
Commercial	C-Source	Recreational	R-Source	Recreational Baltic Sea	R-Source
0.31	Depestele et al. (2014)	0.165	Cappizano et al. (2016)	0.112	Welterbach & Strehlow (2013)

## Sheet: Discard rate
Celtic Sea	Source	North Sea	Source	Wbalt
0.123749	WGCSE (2017)	0.233195	WGNSSK (2017)	0.0395193	WGBFAS (2017)

## Sheet: Denmark recreation calculations
Method	CNS	Skagerrak	Limfjorden	Kattegat
Passive gear	60.3	165.8	3	8.3
Angling license	136	120.1	0.9	28.6
				Total	523

[truncated: 4 more sheets: English charter boats, English boat + shore, English combined, Sweden landings]
