# Supplementary material for: The impact of marine recreational fishing on key fish stocks in European waters
Source: PLoS One. 2018 Sep 12;13(9):e0201666. doi: 10.1371/journal.pone.0201666 (PMC6135385; doi:10.1371/journal.pone.0201666)
Supplement: S3 Table — (XLSX) [file pone.0201666.s003.xlsx]

## Sheet: mac-8c9a
Parameters	Value	Source
Average Retained weight	0.0435462
Average released Weight	#DIV/0!
Average Release Probability (#)	#DIV/0!
Commercial discard / landing	0.137565	WGWIDE (2017)
Recreational Discard Mortality	1	Precautionary value due to lack of data
Commercial Discard Mortality	1	Precautionary value due to lack of data
Total commercial discards	3431
Init data
Country	Year	Angler Numbers	Retained weight	Retained Number	Released weight	Released Number	Source/notes
Spain (Basque country)	2012-2013	62459	72	NA	NA	NA	Zarauz et al. (2013) (Basque country represents 35% of licences in area VIIIa.)
Portugal (North)	2001	59889	0.39	8956	NA	NA	Rangel & Erzini (2007) (Study of Northern Portugal only)
Spain	NA	181651	NA	NA	NA	NA	NA
Portugal	NA	175000	NA	NA	NA	NA	NA
Reconstruction									Calculations
Country	Angler numbers	Retained weight	Retained Number	Released weight	Released Number	Notes	Reconstructed retained?	Reconstructed released?	Retained Wt	Retained # calculation	Released # calculation
Spain	181651	209.4	4808683	0	NA	No release data	137.4	NA	BASQUE	Avg	NA
Portugal	175000	1.14	26170	0	NA	No release data	0.75	NA	Avg	Port (N)	NA
Seems extremely low
% of total weight reconstructed
Retained weight	Released Weight	Total weight
0.65617	NA	NA
Summary with post release mortalities
	Recreational			Commercial			% of catch
Country	Kept	Released mortality	Removal	Landings	Discard mortality	Removal	Recreational	Commercial	Source	Total removal
Spain	209.4	0	209.4	16449	2262.8	18711.8	0.011067	0.988933	0	18921.2
Portugal	1.14	0	1.14	824	113.35	937.35	0.00121472	0.998785	0	938.49
Total	210.54	0	210.54	24941	3431	28372	0.00736604	0.992634	#REF!	28582.5

## Sheet: mac-6
No recreational data

## Sheet: mac-7,8abde
Parameters	Value	Source
Average Retained weight	0.300534
Average released Weight	0.167155
Average Release Probability (#)	0.244237
Commercial discard / landing	0.147593	WGWIDE (2017)
Recreational Discard Mortality	1	Precautionary value due to lack of data
Commercial Discard Mortality	1	Precautionary value due to lack of data
Total commercial discards	9701	Ices assessment
Init data
Country	Year	Angler Numbers	Retained weight	Retained Number	Released weight	Released Number	Source/notes
Channel Islands	NA	4092	NA	NA	NA	NA	NA
England	2012	884000	84.12	279902	15.12	90455	Armstrong (2013)
France	2009-2011	791000	2106.96	NA	NA	NA	Herfaut et al. (2013)
Ireland	NA	76600	NA	NA	NA	NA	NA
Wales	NA	76000	NA	NA	NA	NA	NA
Isle of Man	NA	1560	NA	NA	NA	NA	2014 Population from World Bank (World Bank, 2017) * UK participation rate (Hyder et al. 2018)
Reconstruction									Calculations
Country	Angler numbers	Retained weight	Retained Number	Released weight	Released Number	Notes	Reconstructed retained?	Reconstructed released?	Retained Wt	Retained # calculation	Released # calculation	Bias
Channel Islands	4092	0.39	1296	0.08	419		Y	Y	Avg	EN	EN	0
England	884000	84.12	279902	15.12	90455		N	N	None	None	None	0
France	791000	2106.96	7010727	286.22	1712281		N	Y	None	Avg	Prop	1
Ireland	76600	7.29	24254	1.32	7838		Y	Y	Avg	EN	EN	0
Wales	76000	7.23	24064	1.3	7777		Y	Y	Avg	EN	EN	0
Isle of Man	1560	0.15	494	0.03	160		Y	Y	Avg	EN	EN	0
		2106.96		304.07
% of total weight reconstructed
Retained weight	Released Weight	Total weight
0.0068264	0.950275	0.121109
Summary with post release mortalities
	Recreational			Commercial			% of catch
Country	Kept	Released mortality	Removal	Landings	Discard mortality	Removal	Recreational	Commercial	Source	Total removal	Bias estimation
Channel Islands	0.39	0.08	0.47	0.28	0.04	0.32	0.594937	0.405063	0	0.79	0
England	84.12	15.12	99.24	1266.67	186.95	1453.62	0.0639079	0.936092	0	1552.86	0
France	2106.96	286.22	2393.18	14026	2070.14	16096.1	0.129436	0.870564	0	18489.3	2393.18
Ireland	7.29	1.32	8.61	13280	1960.04	15240	0.00056464	0.999435	0	15248.7	0
Wales	7.23	1.3	8.53	2.66	0.39	3.05	0.736615	0.263385	0	11.58	0
Isle of Man	0.15	0.03	0.18	11	1.62	12.62	0.0140625	0.985938	0	12.8	0
Total	2206.14	304.07	2510.21	28586.6	4219.18	32805.8	0.0710785	0.928921	2012 landings	35316	0.953378
Total catch stats	2206.14	304.07	2510.21	67567.6	9972.51	77540.1	0.0313579	0.968642	#N/A	80050.3
Total ICES	2206.14	304.07	2510.21	65728	9701	75429	0.0322073	0.967793	#N/A	77939.2
Leave-one-out (* = countries used in leave-one-out procedure)
Country	Angler numbers	Retained weight	Retained Number	Released weight	Released Number	Dead releases	Removal
Channel Islands	4092	0.39	1296	0.08	419	0.08	0.47
England*	884000	2354.68	7.835e+06	319.867	1.9136e+06	319.867	2674.55
France*	791000	75.2703	250455	13.5293	80938.8	13.5293	88.7996
Ireland	76600	7.29	24254	1.32	7838	1.32	8.61
Wales	76000	7.23	24064	1.3	7777	1.3	8.53
Isle of Man	1560	0.15	494	0.03	160	0.03	0.18	Upper confidence limit	Lower confidence limit	Result
						Total (LOO)	2781.14	3494.21	1526.21	Good

## Sheet: mac-3&4
Parameters	Value	Source
Average Retained weight	0.365476
Average released Weight	0.206294
Average Release Probability (#)	0.143215
Commercial discard / landing	0.00498626	WGWIDE (2017)
Recreational Discard Mortality	1	Precautionary value due to lack of data
Commercial Discard Mortality	0.835	Precautionary value due to lack of data					1
Total commercial landings	1089
Init data
Country	Year	Angler Numbers	Retained weight	Retained Number	Released weight	Released Number	Source/notes
Belgium	NA	24409	NA	NA	NA	NA	NA
Denmark	NA	386000	NA	NA	NA	NA	NA
England	2012	884000	463.17	1726292	50.08	518249	Armstrong (2013)
Germany	NA	32000	NA	NA	NA	NA	NA
Netherlands	2010-2011	504108	1564	3815000	141	408000	van der Hammen & de Graaf (2013, 2015, 2016)
Norway	NA	1285163	NA	NA	NA	NA	NA
Scotland	NA	125188	NA	NA	NA	NA	NA
Sweden	2015	565634	545.53	NA	NA	NA	Carlstrand (2015)
Norway (Tourism)	2011	NA	54.4	154211	NA	NA	Vølstad et al. (2011)
Reconstruction									Calculations
Country	Angler numbers	Retained weight	Retained Number	Released weight	Released Number	Notes	Reconstructed retained?	Reconstructed released?	Retained Wt	Retained # calculation	Released # calculation	Bias
Belgium	24409	67.51	184723	4.08	19755		Y	Y	Avg	NL	NL	0
Denmark	386000	372.28	1018617	30.09	145881		Y	Y	SE	Avg	Prop	1
England	884000	463.17	1726292	50.08	518249		N	N	None	None	None	0
Germany	32000	88.51	242170	5.34	25899		Y	Y	Avg	NL	NL	0
Netherlands	504108	1564	3815000	141	408000		N	N	None	None	None	0
Norway	1285163	1239.49	3391440	100.2	485705	Tourism removed	Y	Y	SE	Avg	Prop	1
Scotland	125188	89.35	244470	15.14	73392		Y	Y	Avg	EN	EN	0
Sweden	565634	545.53	1492656	44.1	213771		N	Y	None	Avg	Prop	1
		552.52		65.22
% of total weight reconstructed
Retained weight	Released Weight	Total weight
0.419234	0.510089	0.426586
Summary with post release mortalities
	Recreational			Commercial			% of catch
Country	Kept	Released mortality	Removal	Landings	Discard mortality	Removal	Recreational	Commercial	Source	Total removal	Bias
Belgium	67.51	4.08	71.59	43	0.18	43.18	0.623769	0.376231	0	114.77	0
Denmark	372.28	30.09	402.37	36180	150.64	36330.6	0.0109539	0.989046	0	36733	402.37
England	463.17	50.08	513.25	10993.6	45.77	11039.4	0.0444272	0.955573	0	11552.6	0
Germany	88.51	5.34	93.85	4559	18.98	4577.98	0.0200885	0.979912	0	4671.83	0
Netherlands	1564	141	1705	3636	15.14	3651.14	0.318326	0.681674	0	5356.14	0
Norway	1239.49	100.2	1339.69	64182	267.22	64449.2	0.0203635	0.979637	0	65788.9	1339.69
Scotland	89.35	15.14	104.49	57282.4	238.5	57520.9	0.00181326	0.998187	0	57625.4	0
Sweden	545.53	44.1	589.63	4560	18.99	4578.99	0.114079	0.885921	0	5168.62	589.63
Total ICES	4429.84	390.03	4819.87	218400	909.315	219309	0.0215049	0.978495	0	224129	0.483766
Leave-one-out (* = countries used in leave-one-out procedure)
Country	Angler numbers	Retained weight	Retained Number	Released weight	Released Number	Dead releases	Removal
Belgium	24409	67.51	184723	4.08	19755	4.08	71.59
Denmark	386000	372.28	1018617	30.09	145881	30.09	402.37
England*	884000	2445.02	6.68996e+06	147.597	715466	147.597	2592.61
Germany	32000	88.51	242170	5.34	25899	5.34	93.85
Netherlands*	504108	359.786	984432	60.9673	295536	60.9673	420.754
Norway	1285163	1239.49	3391440	100.2	485705	100.2	1339.69
Scotland	125188	89.35	244470	15.14	73392	15.14	104.49
Sweden	565634	545.53	1492656	44.1	213771	44.1	589.63	Upper confidence limit	Lower confidence limit	Result
						Total (LOO)	5614.99	6709.26	2930.48	Good

## Sheet: mac-1,2,5,14
No recreational data

## Sheet: Recreational mac-8c9a
Country	Year	Number of anglers	Kept-wt	Kept-No.	Rel-Wt	Rel-No.	Source
Spain (Basque country)	2012-2013	62459	72	NA	NA	NA	Zarauz et al. (2013) (Basque country represents 35% of licences in area VIIIa.)
Portugal (North)	2001	59889	0.39	8956	NA	NA	Rangel & Erzini (2007) (Study of Northern Portugal only)
Spain	NA	181651	NA	NA	NA	NA	NA
Portugal	NA	175000	NA	NA	NA	NA	NA

## Sheet: Recreational mac-6
Country	Year	Number of anglers	Kept-wt	Kept-No.	Rel-Wt	Rel-No.	Source
Scotland	NA	NA	NA	NA	NA	NA	NA
Northern Ireland	NA	NA	NA	NA	NA	NA	NA

## Sheet: Recreational mac-7,8a-e
Country	Year	Number of anglers	Kept-wt	Kept-No.	Rel-Wt	Rel-No.	Source
Channel Islands	NA	4092	NA	NA	NA	NA	NA
England	2012	884000	84.12	279902	15.12	90455	Armstrong (2013)
France	2009-2011	791000	2106.96	NA	NA	NA	Herfaut et al. (2013)
Ireland	NA	76600	NA	NA	NA	NA	NA
Wales	NA	76000	NA	NA	NA	NA	NA
Isle of Man	NA	1560	NA	NA	NA	NA	2014 Population from World Bank (World Bank, 2017) * UK participation rate (Hyder et al. 2018)

## Sheet: Recreational mac-3&4
Country	Year	Number of anglers	Kept-wt	Kept-No.	Rel-Wt	Rel-No.	Source
Belgium	NA	24409	NA	NA	NA	NA	NA
Denmark	NA	386000	NA	NA	NA	NA	NA
England	2012	884000	463.17	1726292	50.08	518249	Armstrong (2013)
Germany	NA	32000	NA	NA	NA	NA	NA
Netherlands	2010-2011	504108	1564	3815000	141	408000	van der Hammen & de Graaf (2013, 2015, 2016)
Norway	NA	1285163	NA	NA	NA	NA	NA
Scotland	NA	125188	NA	NA	NA	NA	NA
Sweden	2015	565634	545.53	NA	NA	NA	Carlstrand (2015)
Norway (tourism)	2011	NA	54.4	154211	NA	NA	Vølstad et al. (2011)

## Sheet: Recreational mac-1,2,5,14
Country	Year	Number of anglers	Kept-wt	Kept-No.	Rel-Wt	Rel-No.	Source
Greenland	NA	NA	NA	NA	NA	NA	NA
Iceland	NA	NA	NA	NA	NA	NA	NA
Norway	NA	NA	NA	NA	NA	NA	NA
Russia	NA	NA	NA	NA	NA	NA	NA

[truncated: 15 more sheets: Commercial mac-8c9a, Commercial mac-6, Commercial mac-7,8a-e, Commercial mac-1,2,5,14, Commercial mac-3&4, Discard mortality, Discard rate, Portugal calculation, England landings, English charter boat, English private + shore, England combinded, France angler population, France landings, Sweden landings]
