# Supplementary material for: The impact of marine recreational fishing on key fish stocks in European waters
Source: PLoS One. 2018 Sep 12;13(9):e0201666. doi: 10.1371/journal.pone.0201666 (PMC6135385; doi:10.1371/journal.pone.0201666)
Supplement: S4 Table — (XLSX) [file pone.0201666.s004.xlsx]

## Sheet: pol.27.67
Parameters	Value	Source
Average Retained weight	1.58741
Average released Weight	0.506424
Average Release Probability (#)	0.67046				2015 regional population * France participation rate (Hyder et al. 2018). Landings calculated from CPUE & total France landings from Herfaut et al. 2013
Commercial discard to landings ratio	NA	WGCSE (2017)
Recreational Discard Mortality	1	Precautionary value due to lack of data
Commercial Discard Mortality	1	Precautionary value due to lack of data
Init data
Country	Recreational data year	Angler Numbers	Retained weight	Retained Number	Released weight	Released Number	Source/notes
Channel Islands	NA	4092	NA	NA	NA	NA	NA
England	2012	884000	194.74	122678	126.4	249593	Armstrong et al (2013)
France	2009-2011	226366	2493.4	NA	NA	NA	2015 regional population * France participation rate (Hyder et al. 2018). Landings calculated from CPUE & total France landings from Herfaut et al. 2013
Ireland	NA	76600	NA	NA	NA	NA	NA
Isle of Man	NA	1560	NA	NA	NA	NA	2014 Population from World Bank (World Bank, 2017) * UK participation rate (Hyder et al. 2018)
Northern Ireland	NA	32417	NA	NA	NA	NA	2011 Population from UK Census * UK participation rate (Hyder et al. 2018)
Scotland	NA	125188	NA	NA	NA	NA	NA
Wales	NA	76000	NA	NA	NA	NA	NA
Reconstruction									Calculations
Country	Angler numbers	Retained weight	Retained Number	Released weight	Released Number	Notes	Reconstructed retained?	Reconstructed released?	Retained Wt	Retained # calculation	Released # calculation
Channel Islands	4092	0.9	568	0.58	1155		Y	Y	Avg	EN	EN	0
England	884000	194.74	122678	126.4	249593		N	N	None	None	None	0
France	226366	2493.4	1570737	533.32	1053117		N	Y	None	Avg	Prop	1
Ireland	76600	16.87	10630	10.95	21628		Y	Y	Avg	EN	EN	0
Isle of Man	1560	0.34	216	0.22	440		Y	Y	Avg	EN	EN	0
Northern Ireland	32417	7.14	4499	4.64	9153		Y	Y	Avg	EN	EN	0
Scotland	125188	27.58	17373	17.9	35346		Y	Y	Avg	EN	EN	0
Wales	76000	16.74	10547	10.87	21458		Y	Y	Avg	EN	EN	0
		264.31		171.56
% of total weight reconstructed
Retained weight	Released Weight	Total weight
0.0252275	0.820679	0.187158	France kind of reconstructed so may be more uncertain
Summary with post release mortalities
	Recreational			Commercial			% of catch
Country	Kept	Released mortality	Removal	Landings	Discard mortality	Removal	Recreational	Commercial	Source	Total removal
Channel Islands	0.9	0.58	1.48	0.82	0	0.82	0.643478	0.356522	MMO (2012)	2.3	0
England	194.74	126.4	321.14	1435.54	0	1435.54	0.182811	0.817189	MMO (2012)	1756.68	0
France	2493.4	533.32	3026.72	1423	0	1423	0.680205	0.319795	WGCSE (2017)	4449.72	3026.72
Ireland	16.87	10.95	27.82	1175	0	1175	0.023129	0.976871	WGCSE (2017)	1202.82	0
Isle of Man	0.34	0.22	0.56	8.18	0	8.18	0.0640732	0.935927	MMO (2012)	8.74	0
Northern Ireland	7.14	4.64	11.78	8.08	0	8.08	0.593152	0.406848	MMO (2012)	19.86	0
Scotland	27.58	17.9	45.48	31.51	0	31.51	0.590726	0.409274	MMO (2012)	76.99	0
Wales	16.74	10.87	27.61	1.42	0	1.42	0.951085	0.0489149	MMO (2012)	29.03	0
Total (ICES)	2757.71	704.88	3462.59	4513	0	4513	0.434148	0.565852	WGCSE (2017)	7975.59	0.87412
Leave-one-out (* = countries used in leave-one-out procedure)
Country	Angler numbers	Retained weight	Retained Number	Released weight	Released Number	Dead releases	Removal
Channel Islands	4092	0.9	568	0.58	1155	0.58	1.48
England	884000	194.74	122678	126.4	249593	126.4	321.14
France	226366	2493.4	1570737	533.32	1053117	533.32	3026.72
Ireland	76600	16.87	10630	10.95	21628	10.95	27.82
Isle of Man	1560	0.34	216	0.22	440	0.22	0.56
Northern Ireland	32417	7.14	4499	4.64	9153	4.64	11.78
Scotland	125188	27.58	17373	17.9	35346	17.9	45.48
Wales	76000	16.74	10547	10.87	21458	10.87	27.61	Upper confidence limit	Lower confidence limit	Result
						Total (LOO)	3462.59	4819.93	2105.25	Good

## Sheet: pol-89a
Parameters	Value	Source
Average Retained weight	#DIV/0!
Average released Weight	#DIV/0!
Average Release Probability (#)	#DIV/0!
Commercial discard to landings ratio	NA	WGBIE (2017)
Recreational Discard Mortality	1	Precautionary value due to lack of data
Commercial Discard Mortality	1	Precautionary value due to lack of data
Init data
Country	Recreational data year	Angler Numbers	Retained weight	Retained Number	Released weight	Released Number	Source/notes
France	NA	262933	NA	NA	NA	NA	NA
Portugal	NA	175000	NA	NA	NA	NA	NA
Spain	NA	181651	NA	NA	NA	NA	NA
France (Whole)	2006	791000	3500	NA	NA	NA	Herfault et al. (2013)
Reconstruction									Calculations
Country	Angler numbers	Retained weight	Retained Number	Released weight	Released Number	Notes	Reconstructed retained?	Reconstructed released?	Retained Wt	Retained # calculation	Released # calculation
France	262933	1163.42	NA	NA	NA		Y	NA	FR	NA	NA
Portugal	175000	774.34	NA	NA	NA		Y	NA	FR	NA	NA
Spain	181651	803.77	NA	NA	NA		Y	NA	FR	NA	NA
% of total weight reconstructed
Retained weight	Released Weight	Total weight
0.770895	#DIV/0!	0.770895
Summary with post release mortalities
	Recreational			Commercial			% of catch
Country	Kept	Released mortality	Removal	Landings	Discard mortality	Removal	Recreational	Commercial	Source	Total removal
France	1163.42	NA	1163.42	1094	NA	1094	0.515376	0.484624	WGBIE (2017)	2257.42
Portugal	774.34	NA	774.34	2	NA	2	0.997424	0.00257619	WGBIE (2017)	776.34
Spain	803.77	NA	803.77	298	NA	298	0.729526	0.270474	WGBIE (2017)	1101.77
Total ICES	2741.53	NA	2741.53	1483	0	1483	0.648955	0.351045	WGBIE (2017)	4224.53

## Sheet: pol-nsea
Parameters	Value	Source
Average Retained weight	1.24658
Average released Weight	#DIV/0!
Average Release Probability (#)	#DIV/0!
Commercial discard to landings ratio	NA	WGBIE (2017)
Recreational Discard Mortality	1	Precautionary value due to lack of data
Commercial Discard Mortality	1	Precautionary value due to lack of data
Init data
Country	Recreational data year	Angler Numbers	Retained weight	Retained Number	Released weight	Released Number	Source/notes
Belgium	NA	24409	NA	NA	NA	NA	NA
Denmark	NA	386000	NA	NA	NA	NA	NA
England	2012	884000	0	0	0	0	Armstrong et al. (2013)
Germany	NA	32000	NA	NA	NA	NA	NA
Netherlands	NA	504108	NA	NA	NA	NA	NA
Norway	NA	1285163	NA	NA	NA	NA	NA
Scotland	NA	125188	NA	NA	NA	NA	NA
Sweden	NA	565634	NA	NA	NA	NA	NA
Norway Tourism	2009-2011	NA	21.4	17167	NA	21848.9	Vølstad et al. (2011); Ferter et al. (2013)
Reconstruction									Calculations
Country	Angler numbers	Retained weight	Retained Number	Released weight	Released Number	Notes	Reconstructed retained?	Reconstructed released?	Retained Wt	Retained # calculation	Released # calculation
Belgium	24409	0	0	#DIV/0!	#DIV/0!		Y	Y	Avg	EN	Prop
Denmark	386000	0	0	#DIV/0!	#DIV/0!		Y	Y	Avg	EN	Prop
England	884000	0	0	0	0		N	N	None	None	None
Germany	32000	0	0	#DIV/0!	#DIV/0!		Y	Y	Avg	EN	Prop
Netherlands	504108	0	0	#DIV/0!	#DIV/0!		Y	Y	Avg	EN	Prop
Norway	1285163	#DIV/0!	#DIV/0!	#DIV/0!	#DIV/0!		Y	Y	Avg	EN + T	Prop + T
Scotland	125188	0	0	#DIV/0!	#DIV/0!		Y	Y	Avg	EN	Prop
Sweden	565634	0	0	#DIV/0!	#DIV/0!		Y	Y	Avg	EN	Prop
% of total weight reconstructed
Retained weight	Released Weight	Total weight
#DIV/0!	#DIV/0!	#DIV/0!
Summary with post release mortalities
	Recreational			Commercial			% of catch
Country	Kept	Released mortality	Removal	Landings	Discard mortality	Removal	Recreational	Commercial	Source	Total removal
Belgium	0	#DIV/0!	#DIV/0!	17	0	17	#DIV/0!	#DIV/0!	WGNSSK (2017)	#DIV/0!
Denmark	0	#DIV/0!	#DIV/0!	323	0	323	#DIV/0!	#DIV/0!	WGNSSK (2017)	#DIV/0!
England	0	0	0	36.72	0	36.72	0	1	MMO (2012)	36.72
Germany	0	#DIV/0!	#DIV/0!	109	0	109	#DIV/0!	#DIV/0!	WGNSSK (2017)	#DIV/0!
Netherlands	0	#DIV/0!	#DIV/0!	1	0	1	#DIV/0!	#DIV/0!	WGNSSK (2017)	#DIV/0!
Norway	#DIV/0!	#DIV/0!	#DIV/0!	604	0	604	#DIV/0!	#DIV/0!	WGNSSK (2017)	#DIV/0!
Scotland	0	#DIV/0!	#DIV/0!	340.12	0	340.12	#DIV/0!	#DIV/0!	MMO (2012)	#DIV/0!
Sweden	0	#DIV/0!	#DIV/0!	79	0	79	#DIV/0!	#DIV/0!	WGNSSK (2017)	#DIV/0!
Total	#DIV/0!	#DIV/0!	#DIV/0!	1509.84	0	1509.84	#DIV/0!	#DIV/0!	2012 landings	#DIV/0!
Total ICES	#DIV/0!	#DIV/0!	#DIV/0!	1578	0	1578	#DIV/0!	#DIV/0!	WGNSSK (2017)	#DIV/0!

## Sheet: Recreational pol.26.67
Country	Year	Anglers	Kept Wt.	Kept #	Released Wt.	Released #	Source
Channel Islands	NA	4092	NA	NA	NA	NA	NA
England	2012	884000	194.74	122678	126.4	249593	Armstrong et al (2013)
France	2009-2011	226366	2493.4	NA	NA	NA	2015 regional population * France participation rate (Hyder et al. 2018). Landings calculated from CPUE & total France landings from Herfaut et al. 2013
Ireland	NA	76600	NA	NA	NA	NA	NA
Isle of Man	NA	1560	NA	NA	NA	NA	2014 Population from World Bank (World Bank, 2017) * UK participation rate (Hyder et al. 2018)
Northern Ireland	NA	32417	NA	NA	NA	NA	2011 Population from UK Census * UK participation rate (Hyder et al. 2018)
Scotland	NA	125188	NA	NA	NA	NA	NA
Wales	NA	76000	NA	NA	NA	NA	NA

## Sheet: Recreational pol-89a
Country	Year	Anglers	Kept Wt.	Kept #	Released Wt.	Released #	Source	Notes
France (Whole)	2006	791000	3500	NA	NA	NA	Herfault et al. (2013)
France	NA	262933	NA	NA	NA	NA	NA
Portugal	NA	175000	NA	NA	NA	NA	NA
Spain	NA	181651	NA	NA	NA	NA	NA

## Sheet: Recreational pol-nsea
Country	Year	Anglers	Kept Wt.	Kept #	Released Wt.	Released #	Source	Notes
Belgium	NA	24409	NA	NA	NA	NA	NA	NA
Denmark	NA	386000	NA	NA	NA	NA	NA	NA
England	2012	884000	0	0	0	0	Armstrong et al. (2013)	NA
Germany	NA	32000	NA	NA	NA	NA	NA	NA
Netherlands	NA	504108	NA	NA	NA	NA	NA	NA
Norway	NA	1285163	NA	NA	NA	NA	NA	NA
Norway Tourism	2009-2011	NA	21.4	17167	NA	21848.9	Vølstad et al. (2011); Ferter et al. (2013)	Tourism south of 62°. Release prop in Ferter et al. 2013 used to calculate total # caught & subsequently ret + rel #
Scotland	NA	125188	NA	NA	NA	NA	NA	NA
Sweden	NA	565634	NA	NA	NA	NA	NA	NA

## Sheet: Commercial pol27.67
Country	Landings	Source
England	1435.54	MMO (2012)
Wales	1.42	MMO (2012)
Isle of Man	8.18	MMO (2012)
Channel Islands	0.82	MMO (2012)
Belgium	43	WGCSE (2017)
Germany	0	WGCSE (2017)
Denmark	0	WGCSE (2017)
Estonia	0	WGCSE (2017)
Spain	5	WGCSE (2017)
France	1423	WGCSE (2017)
Greenland	90	WGCSE (2017)
Ireland	1175	WGCSE (2017)
Netherlands	1	WGCSE (2017)
Northern Ireland	8.08	MMO (2012)
Scotland	31.51	MMO (2012)
Total (ICES & MMO)	4222.55	WGCSE (2017); MMO (2012)
Total (ICES)	4513	WGCSE (2017)

## Sheet: Commercial pol-89a
Country	Biscay	Iberian	Source
Belgium	0	0	WGBIE (2017)
France	1094	0	WGBIE (2017)
Portugal	0	2	WGBIE (2017)
Spain	159	139	WGBIE (2017)
UK	2	0	WGBIE (2017)
Total ICES	1483		WGBIE (2017)

## Sheet: Commercial pol-nsea
Country	Subarea 3a	Subarea 4	Source
Belgium	0	17	WGNSSK (2017)
Denmark	200	123	WGNSSK (2017)
Faeroes	0	0	WGNSSK (2017)
France	0	3	WGNSSK (2017)
Germany	7	102	WGNSSK (2017)
Netherlands	0	1	WGNSSK (2017)
Norway	171	433	WGNSSK (2017)
Poland	0	0	WGNSSK (2017)
Sweden	37	42	WGNSSK (2017)
England	0	36.72	MMO (2012)
Scotland	0	340.12	MMO (2012)
Total ICES	414	1164	WGNSSK (2017)

## Sheet: Discard mortality
Recreational	Source	Commercial	Source
1	Precautionary value due to lack of data	1	Precautionary value due to lack of data

[truncated: 6 more sheets: Discard rate, England charter, England boat + shore, England combined, France angler population, France landing calculation]
