# Supplementary material for: The impact of marine recreational fishing on key fish stocks in European waters
Source: PLoS One. 2018 Sep 12;13(9):e0201666. doi: 10.1371/journal.pone.0201666 (PMC6135385; doi:10.1371/journal.pone.0201666)
Supplement: S5 Table — (XLSX) [file pone.0201666.s005.xlsx]

## Sheet: sal-22-31
Parameters	Value	Source
Average Retained weight	5.7905
Average released Weight	NA
Average Release Probability (#)	0.302024
Commercial dead discard to landings ratio	0.127294	WGBAST (2017)
Recreational Discard Mortality	0.25	WGBAST (2017)
Commercial Discard Mortality	1	Precautionary value due to lack of data
Total dead commercial discards	9071	WGBAST 2017
Init data
Country	Recreational data year	Angler Numbers	Retained weight	Retained Number	Released weight	Released Number	Source/notes
Denmark	2015	386000	52.81	10562	NA	5963	WGRFS (2017); WGBAST (2017)
Estonia	2016	20000	NA	432	NA	NA	WGBAST (2017)
Finland	2016	300000	NA	8550	NA	NA	WGBAST (2017)
Germany	2016	163000	31.268	3958	NA	320	WGBAST (2017)
Latvia	2016	41000	NA	976	NA	NA	WGBAST (2017)
Lithuania	2016	60000	NA	1510	NA	NA	WGBAST (2017)
Poland	2016	82000	NA	NA	NA	NA	WGBAST (2017)
Sweden	2016	565634	NA	1603	NA	NA	WGBAST (2017)
Reconstruction									Calculations
Country	Angler numbers	Retained weight	Retained Number	Released weight	Released Number	Notes	Reconstructed retained?	Reconstructed released?	Retained Wt	Retained # calculation	Released # calculation		Bias
Denmark	386000	52.81	10562	#VALUE!	5963		N	N	None	None	None	5963	0
Estonia	20000	2.50149	432	#VALUE!	130.474		N	Y	Avg	None	Prop	130	0
Finland	300000	49.5087	8550	#VALUE!	2582.3		N	Y	Avg	None	Prop	2582	0
Germany	163000	31.268	3958	#VALUE!	320		N	N	None	None	None	320	0
Latvia	41000	5.65152	976	#VALUE!	294.775		N	Y	Avg	None	Prop	295	0
Lithuania	60000	8.74365	1510	#VALUE!	456.056		N	Y	Avg	None	Prop	456	0
Poland	82000	11.5297	1991.14	#VALUE!	601.372		Y	Y	Avg	DE	Prop	601	0
Sweden	565634	9.28216	1603	#VALUE!	484.144		N	Y	Avg	None	Prop	484	0
% of total numbers reconstructed
Retained number	Released number	Total number
0.0673089	0.419966	0.161831
Summary with post release mortalities
	Recreational			Commercial			% of catch
Country	Kept	Released mortality	Removal	Landings	Discard mortality	Removal	Recreational	Commercial	Source	Total removal
Denmark	10562	1490.75	12052.8	9684	1232.72	10916.7	0.524729	0.475271	WGBAST (2017)	22969.5
Estonia	432	32.6186	464.619	726	92.4157	818.416	0.362125	0.637875	WGBAST (2017)	1283.03
Finland	8550	645.576	9195.58	24585	3129.53	27714.5	0.249134	0.750866	WGBAST (2017)	36910.1
Germany	3958	80	4038	1616	205.708	1821.71	0.689113	0.310887	WGBAST (2017)	5859.71
Latvia	976	73.6938	1049.69	724	92.1612	816.161	0.562581	0.437419	WGBAST (2017)	1865.85
Lithuania	1510	114.014	1624.01	344	43.7893	387.789	0.807243	0.192757	WGBAST (2017)	2011.8
Poland	1991	150.343	2141.34	3647	464.243	4111.24	0.342473	0.657527	WGBAST (2017)	6252.59
Sweden	1603	121.036	1724.04	29312	3731.25	33043.3	0.0495879	0.950412	WGBAST (2017)	34767.3
Total	29582	2708.03	32290	71260	9071	80331	0.286714	0.713286	2016 landings	112621
Leave-one-out (* = countries used in leave-one-out procedure)
Country	Angler numbers	Retained weight	Retained Number	Released weight	Released Number	Dead releases	Removal
Denmark*	386000		9372.93		757.791	189.448	9562.38
Estonia	20000		432		130.474	32.6186	464.619
Finland	300000		8550		2582.3	645.576	9195.58
Germany*	163000		4460.12		2518.05	629.514	5089.63
Latvia	41000		976		294.775	73.6938	1049.69
Lithuania	60000		1510		456.056	114.014	1624.01
Poland	82000		1991.14		601.372	150.343	2141.48
Sweden	565634		1603		484.144	121.036	1724.04	Upper confidence limit	Lower confidence limit	Result
						Total (LOO)	30851.4	44947.9	19632.4	Good

## Sheet: Recreational sal-22-31
Country	Year	Anglers	Kept Wt.	Kept #	Released Wt.	Released #	Source
Denmark	2015	386000	52.81	10562	NA	5963	WGRFS (2017); WGBAST (2017)
Estonia	2016	20000	NA	432	NA	NA	WGBAST (2017)
Finland	2016	300000	NA	8550	NA	NA	WGBAST (2017)
Germany	2016	163000	31.268	3958	NA	320	WGBAST (2017)
Latvia	2016	41000	NA	976	NA	NA	WGBAST (2017)
Lithuania	2016	60000	NA	1510	NA	NA	WGBAST (2017)
Poland	2016	82000	NA	NA	NA	NA	WGBAST (2017)
Sweden	2016	565634	NA	1603	NA	NA	WGBAST (2017)

## Sheet: Commercial sal-22-31
Country	Landings	Source	Year
Denmark	9684	WGBAST (2017)	2016
Estonia	726	WGBAST (2017)	2016
Finland	24585	WGBAST (2017)	2016
Germany	1616	WGBAST (2017)	2016
Latvia	724	WGBAST (2017)	2016
Lithuania	344	WGBAST (2017)	2016
Poland	3647	WGBAST (2017)	2016
Sweden	29312	WGBAST (2017)	2016

## Sheet: Discard mortality
Recreational	Source	Commercial	Source
0.25	WGBAST (2017)	1	Precautionary value due to lack of data

## Sheet: Discard rate
sal-bal	Source
0.127294	WGBAST (2017)
