# Supplementary material for: The impact of marine recreational fishing on key fish stocks in European waters
Source: PLoS One. 2018 Sep 12;13(9):e0201666. doi: 10.1371/journal.pone.0201666 (PMC6135385; doi:10.1371/journal.pone.0201666)
Supplement: S6 Table — (XLSX) [file pone.0201666.s006.xlsx]

## Sheet: ele-3a,4,7
Parameters	Value	Source
Average Retained weight	0.206592
Average released Weight	0.66732
Average Release Probability (#)	0.530137
Commercial discard rate	NA	NA
Recreational Discard Mortality	1	Precautionary value due to lack of data
Commercial Discard Mortality	1	Precautionary value due to lack of data
Init data
Country	Year	Angler Numbers	Retained weight	Retained Number	Released weight	Released Number	Source/notes
Germany	2012	32000	4	16858	0.4	5534	ICES WGRFS 2017
Denmark	2011	386000	43.3	NA	NA	28984	Sparrehoven & Storr-Paulsen 2011 (Actually 2010/11 numbers)
Norway	2015	1285163	0	0	0	0	Illegal to fish eel
England (Target area)	2012	125188	NA	5300	NA	32000	ICES WGRFS 2016
England (Whole)	2012	884000	2.32	9862	26.16	34267	Armstrong (2013) - Unpublished supplementary material
Belgium	NA	24409	NA	NA	NA	NA	NA
Netherlands	2012	504108	18	91000	NA	67000	van der Hammen & de Graff (2015); WGRFS (2016)
Scotland	NA	125188	NA	NA	NA	NA	NA
France	NA	791000	NA	NA	NA	NA	NA
Wales	NA	76000	NA	NA	NA	NA	NA
Ireland	NA	76600	NA	NA	NA	NA	NA
Reconstruction									Calculations
Country	Angler numbers	Retained weight	Retained Number	Released weight	Released Number	Notes	Reconstructed retained?	Reconstructed released?	Retained Wt	Retained # calculation	Released # calculation	Bias
Germany	32000	4	16858	0.4	5534		N	N	None	None	None	0
Denmark	386000	43.3	209592	19.34	28984		N	Y	None	Avg	None	0
Norway	1285163	0	0	0	0	Eel fishing illegal	N	N	None	None	None	0
England (Target area)	125188	1.09	5300	21.35	32000		Y	Y	Avg	None	None	3
Belgium	24409	0.91	4406	2.16	3244		Y	Y	Avg	NL	NL	0
Netherlands	504108	18	91000	44.71	67000		N	Y	None	None	None	0
Scotland	125188	0.29	1397	3.24	4853		Y	Y	Avg	EN	EN	2
France	791000	1.82	8824	20.46	30662		Y	Y	Avg	EN	EN	2
Wales	76000	0.18	848	1.97	2946		Y	Y	Avg	EN	EN	2
Ireland	76600	0.18	855	1.98	2969		Y	Y	Avg	EN	EN	2
% of total weight reconstructed																			The precautionary value was used if there was no available data for the marine recreational fishey
Retained weight	Released Weight	Total weight
0.0640677	0.99654	0.645593
Summary with post release mortalities
	Recreational			Commercial			% of catch
Country	Kept	Released mortality	Removal	Landings	Discard mortality	Removal	Recreational	Commercial	Source	Total removal	Bias
Germany	4	0.4	4.4	0	0	0	1	0	ICES (2017)	4.4	0
Denmark	43.3	19.34	62.64	37	0	37	0.628663	0.371337	ICES (2017)	99.64	0
Norway	0	0	0	0	0	0	Illegal to fish		ICES (2017)	0	0
England (Target area)	1.09	21.35	22.44	0.32	0	0.32	0.98594	0.0140598	MMO (2012)	22.76	67.32
Belgium	0.91	2.16	3.07	0	0	0	1	0	ICES (2017)	3.07	0
Netherlands	18	44.71	62.71	1	0	1	0.984304	0.0156961	ICES (2017)	63.71	0
Scotland	0.29	3.24	3.53	0.25	0	0.25	0.933862	0.0661376	MMO (2012)	3.78	7.06
France	1.82	20.46	22.28	0	0	0	1	0	ICES (2017)	22.28	44.56
Wales	0.18	1.97	2.15	0	0	0	1	0	MMO (2012)	2.15	4.3
Ireland	0.18	1.98	2.16	0	0	0	1	0	ICES (2017)	2.16	4.32
Total	69.77	115.61	185.38	38.57	0	38.57	0.827774	0.172226	2012 landings	223.95	0.6881
						Landings %	64.3991	35.6009
Belgium	7.37
Denmark	47.82							Belgium	0	0
England (Target area)	6.38							Denmark	0	0
France	2.62							England (Target area)	0.128228	0.13
Germany	4.1							France	0.052658	0.05
Ireland	0.67							Germany	0	0
Netherlands	18.54							Ireland	0.013466	0.01
Norway	0							Netherlands	0	0
Scotland	11.34							Norway	0	0
Wales	0.67							Scotland	0.227917	0.23
Total	99.51							Wales	0.013466	0.01
			Country	Bias
			Germany	0
			Denmark	0
			Norway	0
			England (Target area)	3
			Belgium	0
			Netherlands	0
			Scotland	2
			France	2
			Wales	2
			Ireland	2

## Sheet: ele-balti
Parameters	Value	Source
Average Retained weight	0.371839
Average released Weight	0.0634115
Average Release Probability (#)	0.281055
Commercial discard rate	NA	NA
Recreational Discard Mortality	1	Precautionary value due to lack of data
Commercial Discard Mortality	1	Precautionary value due to lack of data
Init data
Country	Year	Angler Numbers	Retained weight	Retained Number	Released weight	Released Number	Source/notes
Denmark	2010	386000	73	NA	NA	17893	Sparrevohn et al. (2012)
Estonia	2014	20000	0.005	NA	NA	NA	WGRFS (2017)
Finland	2014	300000	8	NA	0	NA	WGRFS (2017)
Germany	2012	163000	1.5	4034	0.1	1577	WGRFS (2017)
Latvia	2014	41000	0.1	NA	NA	1386200	WGRFS (2017)
Lithuania	2015	60000	4.9	NA	NA	NA	WGRFS (2017)
Poland	NA	82000	NA	NA	NA	NA	NA
Sweden	NA	565634	0	0	0	0	Illegal to fish recreationally
Reconstruction									Calculations
Country	Angler numbers	Retained weight	Retained Number	Released weight	Released Number	Notes	Reconstructed retained?	Reconstructed released?	Retained Wt	Retained # calculation	Released # calculation	Bias
Denmark	386000	73	196321	1.13	17893		N	Y	None	Avg	None	0
Estonia	20000	0.01	27	0	8		N	Y	None	Avg	Prop	0
Finland	300000	8	21515	0	0		N	N	None	Avg	Avg	0
Germany	163000	1.5	4034	0.1	1577		N	N	None	None	None	0
Latvia	41000	0.1	269	87.9	1386200		N	Y	None	Avg	None	0
Lithuania	60000	4.9	13178	0.23	3704		N	Y	None	Avg	Prop	0
Poland	82000	0.75	2029	0.04	570		Y	Y	Avg	DE	Prop	0
Sweden	565634	0	0	0	0		N	N	None	None	None	-2
% of total weight reconstructed
Retained weight	Released Weight	Total weight
0.00849762	0.998881	0.506867
Summary with post release mortalities
	Recreational			Commercial			% of catch
Country	Kept	Released mortality	Removal	Landings	Discard mortality	Removal	Recreational	Commercial	Source	Total removal	Bias
Denmark	73	1.13	74.13	267	0	267	0.217307	0.782693	ICES (2017)	341.13	0
Estonia	0.01	0	0.01	2	0	2	0.00497512	0.995025	ICES (2017)	2.01	0
Finland	8	0	8	1	0	1	0.888889	0.111111	ICES (2017)	9	0
Germany	1.5	0.1	1.6	41	0	41	0.0375587	0.962441	ICES (2017)	42.6	0
Latvia	0.1	87.9	88	0	0	0	1	0	ICES (2017)	88	0
Lithuania	4.9	0.23	5.13	0	0	0	1	0	ICES (2017)	5.13	0
Poland	0.75	0.04	0.79	31	0	31	0.0248506	0.975149	ICES (2017)	31.79	0
Sweden	0	0	0	237	0	237	0	1	ICES (2017)	237	0
TOTAL	88.26	89.4	177.66	579	0	579	0.234795	0.765205	2012 landings	756.66	0
						Landings	0.132272

## Sheet: Recreational ele-nsea-chnl-celt
Country	Year	Number of anglers	Kept-wt	Kept-No.	Rel-Wt	Rel-No.	Source	Angler number source
Germany	2012	32000	4	16858	0.4	5534	ICES WGRFS 2017	Hyder et al. 2018			Kept-wt	Kept-No.	Rel-Wt	Rel-No.		Kept-wt	Kept-No.	Rel-Wt	Rel-No.
Denmark	2011	386000	43.3	NA	NA	28984	Sparrehoven & Storr-Paulsen 2011 (Actually 2010/11 numbers)	Hyder et al. 2018		Could also use	23.8	NA	NA	73068	WGRFS (2017) - 2015 study	43.1	NA	NA	NA	Sparrehoven & Storr-Paulsen 2012 (Actually 2009 numbers)
Norway	2015	1285163	0	0	0	0	Illegal to fish eel	Hyder et al. 2018
England (Target area)	2012	125188	NA	5300	NA	32000	ICES WGRFS 2016	Arkenford (2016)
England (Whole)	2012	884000	2.32	9862	26.16	34267	Armstrong (2013) - Unpublished supplementary material	Hyder et al. 2018
Belgium	NA	24409	NA	NA	NA	NA	NA	Hyder et al. 2018			Kept-wt	Kept-No.	Rel-Wt	Rel-No.
Netherlands	2012	504108	18	91000	NA	67000	van der Hammen & de Graff (2015); WGRFS (2016)	Hyder et al. 2018		Could also use	40	193000	NA	247000	van Der Hammen & de Graff (2017) - 2015 numbers
Scotland	NA	125188	NA	NA	NA	NA	NA	Hyder et al. 2018
France	NA	791000	NA	NA	NA	NA	NA	Hyder et al. 2018
Wales	NA	76000	NA	NA	NA	NA	NA	Arkenford (2016)
Ireland	NA	76600	NA	NA	NA	NA	NA	Arkenford (2016)

## Sheet: Recreational ele-balt
Country	Year	Number of anglers	Kept-wt	Kept-No.	Rel-Wt	Rel-No.	Source	Angler number source
Denmark	2010	386000	73	NA	NA	17893	Sparrevohn et al. (2012)	Hyder et al. 2018
Estonia	2014	20000	0.005	NA	NA	NA	WGRFS (2017)	Hyder et al. 2018
Finland	2014	300000	8	NA	0	NA	WGRFS (2017)	Hyder et al. 2018
Germany	2012	163000	1.5	4034	0.1	1577	WGRFS (2017)	Hyder et al. 2018
Latvia	2014	41000	0.1	NA	NA	1386200	WGRFS (2017)	Hyder et al. 2018
Lithuania	2015	60000	4.9	NA	NA	NA	WGRFS (2017)	Hyder et al. 2018
Poland	NA	82000	NA	NA	NA	NA	NA	Hyder et al. 2018
Sweden	NA	565634	0	0	0	0	Illegal to fish recreationally	Hyder et al. 2018

## Sheet: Commercial ele-nsea-chnl-celt
Country	Landings	Source
Germany	0	ICES (2017)
Denmark	37	ICES (2017)
Sweden	0	ICES (2017)
Norway	0	ICES (2017)
England (Target area)	0.3176	MMO (2012)
Belgium	0	ICES (2017)
Netherlands	1	ICES (2017)
Scotland	0.253	MMO (2012)
Wales	0	MMO (2012)
Ireland	0	ICES (2017)
France	0	ICES (2017)

## Sheet: Commercial ele-balt
Country	Landings	Source
Denmark	267	ICES (2017)
Estonia	2	ICES (2017)
Finland	1	ICES (2017)
Germany	41	ICES (2017)
Latvia	0	ICES (2017)
Lithuania	0	ICES (2017)
Poland	31	ICES (2017)
Sweden	237	ICES (2017)

## Sheet: Discard mortality
Commercial	Source	Recreational	Source
1	Precautionary value due to lack of data	1	Precautionary value due to lack of data

## Sheet: Discard rate
Commercial ele-nsea	Source	Commercial ele-balt	Source	Commercial ele-nea	Source
NA	NA	NA	NA	NA	NA

## Sheet: Denmark landings
Sparrevohn & Storr-Paulsen 2010 - Actually 2010/11 numbers
Area	Tonnes harvested	No. released
Eastern Baltic	1.5	3437
Arkona Sea	9.4	2494
Belt Sea	50	15750
The Sound	12.1	4426
Kattegat	22.1	9986
Limjjorden	13.8	7739
Skagerrak	6.6	6029
North Sea	0.8	804
North Sea retained wt	North Sea released No
43.3	28984
Baltic Sea retained wt	Baltic Sea released No
73	26107
Sparrevohn & Storr-Paulsen 2012 - Actually 2009 numbers
Area	Tonnes harvested	No. released
Eastern Baltic	1
Arkona Sea	9.3
Belt Sea	44.9
The Sound	6
Kattegat	26.8
Limjjorden	12.3
Skagerrak	0.7
North Sea	3.3
North Sea retained wt	North Sea released No
43.1	NA
Baltic Sea retained wt	Baltic Sea released No
61.2	NA
