# Supplementary material for: The impact of marine recreational fishing on key fish stocks in European waters
Source: PLoS One. 2018 Sep 12;13(9):e0201666. doi: 10.1371/journal.pone.0201666 (PMC6135385; doi:10.1371/journal.pone.0201666)
Supplement: S7 Table — (XLSX) [file pone.0201666.s007.xlsx]

## Sheet: trs-22-32
Parameters	Value	Source
Average Retained weight	#DIV/0!
Average released Weight	#DIV/0!
Average Release Probability (#)	#DIV/0!
Commercial discard rate	NA	WGBAST (2017)
Recreational Discard Mortality	1	Precautionary value due to lack of data
Commercial Discard Mortality	1	Precautionary value due to lack of data
Init data
Country	Year	Angler Numbers	Retained weight	Retained Number	Released weight	Released Number	Source/notes
Denmark	2015	386000	395.7	NA	NA	NA	WGBAST (2017)
Estonia	2016	20000	7.2	NA	NA	NA	WGBAST (2017)
Finland	2016	300000	71	NA	NA	NA	WGBAST (2017)
Germany	2016	163000	NA	NA	NA	NA	WGBAST (2017)
Latvia	2016	41000	5	NA	NA	NA	WGBAST (2017)
Lithuania	2016	60000	NA	NA	NA	NA	WGBAST (2017)
Poland	2016	82000	NA	NA	NA	NA	WGBAST (2017)
Sweden	2016	565634	NA	NA	NA	NA	WGBAST (2017)
Reconstruction									Calculations
Country	Angler numbers	Retained weight	Retained Number	Released weight	Released Number	Notes	Reconstructed retained?	Reconstructed released?	Retained Wt	Retained # calculation	Released # calculation
Denmark	386000	395.7	#VALUE!	#VALUE!	#VALUE!		N	Y	None
Estonia	20000	7.2	#VALUE!	#VALUE!	#VALUE!		N	Y	None
Finland	300000	71	#VALUE!	#VALUE!	#VALUE!		N	Y	None
Germany	163000	167.096	#VALUE!	#VALUE!	#VALUE!		Y	Y	DE
Latvia	41000	5	#VALUE!	#VALUE!	#VALUE!		N	Y	None
Lithuania	60000	7.31707	#VALUE!	#VALUE!	#VALUE!		Y	Y	LA
Poland	82000	84.0606	#VALUE!	#VALUE!	#VALUE!		Y	Y	DE
Sweden	565634	579.848	#VALUE!	#VALUE!	#VALUE!		Y	Y	DE
% of total weight reconstructed
Retained weight	Released Weight	Total weight
0.916878	#VALUE!	#VALUE!
Summary with post release mortalities
	Recreational			Commercial			% of catch
Country	Kept	Released mortality	Removal	Landings	Discard mortality	Removal	Recreational	Commercial	Source	Total removal
Denmark	395.7	#VALUE!	#VALUE!	1	NA	1	#VALUE!	#VALUE!	ICES WGBAST 2017	#VALUE!
Estonia	7.2	#VALUE!	#VALUE!	20	NA	20	#VALUE!	#VALUE!	ICES WGBAST 2017	#VALUE!
Finland	71	#VALUE!	#VALUE!	27	NA	27	#VALUE!	#VALUE!	ICES WGBAST 2017	#VALUE!
Germany	167.096	#VALUE!	#VALUE!	12	NA	12	#VALUE!	#VALUE!	ICES WGBAST 2017	#VALUE!
Latvia	5	#VALUE!	#VALUE!	5	NA	5	#VALUE!	#VALUE!	ICES WGBAST 2017	#VALUE!
Lithuania	7.31707	#VALUE!	#VALUE!	4	NA	4	#VALUE!	#VALUE!	ICES WGBAST 2017	#VALUE!
Poland	84.0606	#VALUE!	#VALUE!	148	NA	148	#VALUE!	#VALUE!	ICES WGBAST 2017	#VALUE!
Sweden	579.848	#VALUE!	#VALUE!	12	NA	12	#VALUE!	#VALUE!	ICES WGBAST 2017	#VALUE!
Total	914.322	#VALUE!	#VALUE!	229	NA	229	#VALUE!	#VALUE!	2012 landings	#VALUE!
Total (ICES)	914.322	#VALUE!	#VALUE!	#N/A	NA	#N/A	#VALUE!	#N/A	#N/A	#N/A

## Sheet: Recreational trs-22-32
Country	Year	Anglers	Kept Wt.	Kept #	Released Wt.	Released #	Source
Denmark	2015	386000	395.7	NA	NA	NA	WGBAST (2017)
Estonia	2016	20000	7.2	NA	NA	NA	WGBAST (2017)
Finland	2016	300000	71	NA	NA	NA	WGBAST (2017)
Germany	2016	163000	NA	NA	NA	NA	WGBAST (2017)
Latvia	2016	41000	5	NA	NA	NA	WGBAST (2017)
Lithuania	2016	60000	NA	NA	NA	NA	WGBAST (2017)
Poland	2016	82000	NA	NA	NA	NA	WGBAST (2017)
Sweden	2016	565634	NA	NA	NA	NA	WGBAST (2017)

## Sheet: Commercial trs-22-32
Country	Year	Landings	Source
Denmark	2016	1	WGBAST (2017)
Estonia	2016	20	WGBAST (2017)
Finland	2016	27	WGBAST (2017)
Germany	2016	12	WGBAST (2017)
Latvia	2016	5	WGBAST (2017)
Lithuania	2016	4	WGBAST (2017)
Poland	2016	148	WGBAST (2017)
Sweden	2016	12	WGBAST (2017)

## Sheet: Discard mortality
Recreational	Source	Commercial	Source
1	Precautionary value due to lack of data	1	Precautionary value due to lack of data

## Sheet: Discard rate
trt-bal	Source
NA	WGBAST (2017)
