# Supplementary material for: The impact of marine recreational fishing on key fish stocks in European waters
Source: PLoS One. 2018 Sep 12;13(9):e0201666. doi: 10.1371/journal.pone.0201666 (PMC6135385; doi:10.1371/journal.pone.0201666)
Supplement: S8 Table — (XLSX) [file pone.0201666.s008.xlsx]

## Sheet: Summaries
Row Labels	Sum of Removal	RSE	SD	Varience	LCL	UCL
bss-47	1479.91	0.2	295.982	87605.2	899.785	2060.03
bss-8ab	1429.8	0.2	285.96	81773.1	869.318	1990.28
bss-8c9a	405.683	0.2	81.1365	6583.14	246.655	564.71
cod-2224	4595.27	0.2	919.054	844661	2793.93	6396.62
cod-347d	3898.5	0.2	779.7	607932	2370.29	5426.71
cod-7e-k	296.781	0.2	59.3562	3523.15	180.443	413.119
mac-3&4	4819.87	0.2	963.974	929246	2930.48	6709.26
mac-7,8abde	2510.21	0.2	502.042	252046	1526.21	3494.21
pol.27.67	3462.59	0.2	692.518	479581	2105.25	4819.93
sal-22-31	32290.2	0.2	6458.03	4.17062e+07	19632.4	44947.9
